# Supplementary material for: Time course gene expression profiling of yeast spore germination reveals a network of transcription factors orchestrating the global response
Source: PubMed Central journal article supplement (PMC3577491; doi:10.1186/1471-2164-13-554), 2012-10-15

# Additional file 1

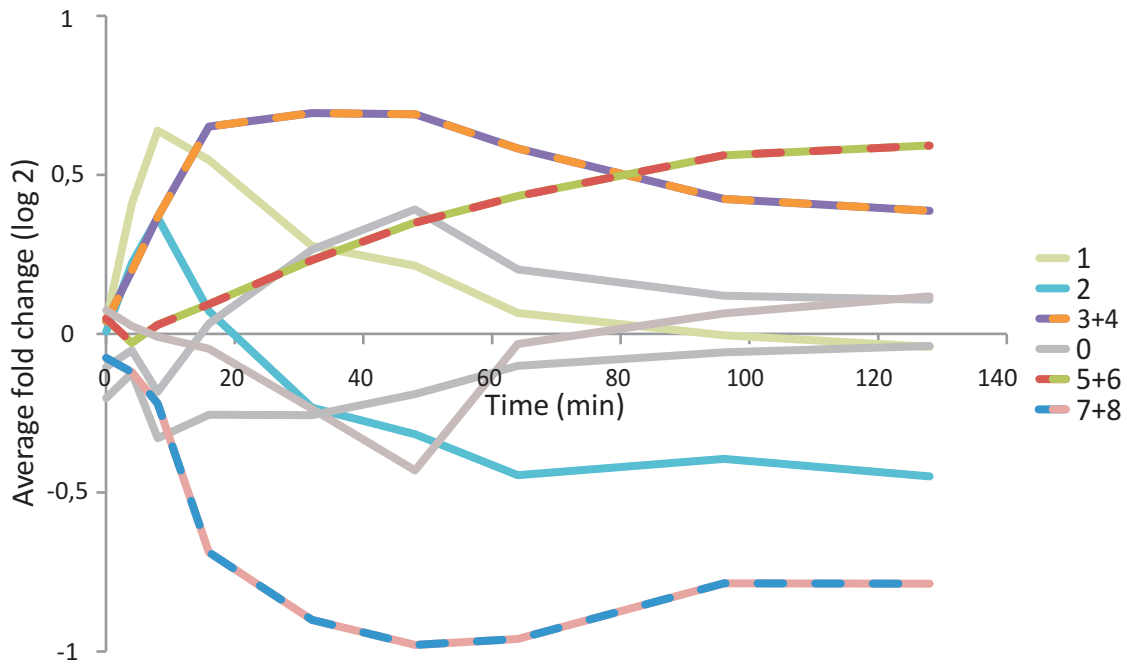

Supplement: 1471-2164-13-554-S1.pdf [file 1471-2164-13-554-S1.pdf]
