# Supplementary material for: Time course gene expression profiling of yeast spore germination reveals a network of transcription factors orchestrating the global response
Source: PubMed Central journal article supplement (PMC3577491; doi:10.1186/1471-2164-13-554), 2012-10-15
Supplement: 1471-2164-13-554-S2.pdf [file 1471-2164-13-554-S2.pdf]

## Additional file 2

| Cluster 1<br>(569) |         | Cluster 2<br>(476) |         | Cluster 3+4<br>(1268) |         | Cluster 5+6<br>(756) |         | Cluster 7+8<br>(1749) |         |
|--------------------|---------|--------------------|---------|-----------------------|---------|----------------------|---------|-----------------------|---------|
| TF                 | T-value | TF                 | T-value | TF                    | T-value | TF                   | T-value | TF                    | T-value |
| HSF1               | 5.08    | NRG1               | 3.26    | YAP6                  | 3.57    | STE12                | 9.47    | PHD1                  | 3.16    |
| PHD1               | 3.17    | HSF1               | 3.04    | CBF1                  | 3.27    | FHL1                 | 8.99    | YAP6                  | 2.85    |
| MSN4               | 3.01    | SOK2               | 1.83    | RTG3                  | 1.47    | RAP1                 | 6.67    | NRG1                  | 2.37    |
| MSN2               | 2.47    | FHL1               | 1.77    | NRG1                  | 1.45    | DIG1                 | 4.85    | FHL1                  | 1.56    |
| NRG1               | 2.42    | PHD1               | 1.64    | UME6                  | 1.41    | SFP1                 | 3.74    | STE12                 | 1.35    |
| YAP6               | 1.90    | NRG1               | 1.42    | HSF1                  | 1.29    | PHD1                 | 2.70    | ROX1                  | 1.27    |
| CBF1               | 1.42    | UME6               | 1.31    | PHD1                  | 1.12    | NRG1                 | 2.01    | ABF1                  | 1.07    |
| UME6               | 1.08    | MSN2               | 1.28    | MSN2                  | 0.88    | YAP6                 | 1.96    | DIG1                  | 0.97    |
| SOK2               | 1.05    | YAP6               | 0.75    | RAP1                  | 0.51    | HAP1                 | 1.21    | SOK2                  | 0.93    |
| FHL1               | 1.03    | RAP1               | 0.44    | HAP1                  | 0.32    | ROX1                 | 0.73    | CBF1                  | 0.59    |
| STE12              | 0.89    | HAP1               | -0.02   | ROX1                  | 0.23    | ABF1                 | -0.57   | RAP1                  | 0.50    |
| RAP1               | 0.12    | RTG3               | -0.45   | ABF1                  | -0.32   | UME6                 | -0.75   | HAP1                  | -0.57   |
| HAP1               | -0.64   | CBF1               | -0.54   | SFP1                  | -0.59   | CBF1                 | -1.00   | UME6                  | -1.48   |
| ABF1               | -0.64   | MSN4               | -0.98   | DIG1                  | -1.09   |                      |         | RTG3                  | -1.56   |
|                    |         | STE12              | -1.14   | MSN4                  | -1.30   |                      |         | MSN4                  | -3.39   |
|                    |         | ABF1               | -2.25   | STE12                 | -1.48   |                      |         | HSF1                  | -3.52   |
|                    |         |                    |         | FHL1                  | -2.27   |                      |         | MSN2                  | -4.47   |
|                    |         |                    |         |                       |         |                      |         | GCR2                  | -4.94   |
